# Supplementary material
Source: PubMed Central journal article supplement (PMC3784210)
Supplement: cei0174-0027-SD1.pdf [file cei0174-0027-SD1.pdf]

## Supplementary Tables

**Table 1**

**Antibody panel for HSPC isolation**

| <b>Antibody (clone)</b> | <b>Fluorochrome conjugate</b> |
|-------------------------|-------------------------------|
| Sca1 (D7)               | PE                            |
| c-Kit (2B8)             | APC                           |
| CD3 (145-2C11)          | PE-Cy5                        |
| CD4 (GK-1.5)            | PE-Cy5                        |
| CD8 (53-6.7)            | PE-Cy5                        |
| CD5 (53-7.3)            | PE-Cy5                        |
| B220 (RA3-6B2)          | PE-Cy5                        |
| GR-1 (RB6-8C5)          | PE-Cy5                        |
| Mac-1 (M1/70)           | PE-Cy5                        |
| Ter119 (Ter-119)        | PE-Cy5                        |

**Table 2**

**Antibody panel for FACS analysis**

| <b>Antibody (clone)</b> | <b>Fluorochrome Conjugate</b> |
|-------------------------|-------------------------------|
| C45.1 (A20)             | Pacific Blue                  |
| CD45.2 (104)            | PerCP Cy5.5                   |
| CD4 (GK1.5)             | Alexafluor 700                |
| CD8 (53-6.7)            | eFluor 780 APC                |
| FR4 (eBio12A5)          | FITC                          |
| CD73 (eBio TY/11.8)     | biotin                        |
| CD44 (IM7)              | biotin                        |
| Foxp3 (FJK-16s)         | APC                           |
| CD25 (PC61.5)           | PECY7                         |
| CD103 (2E7)             | PE                            |

Supplementary Figure 1

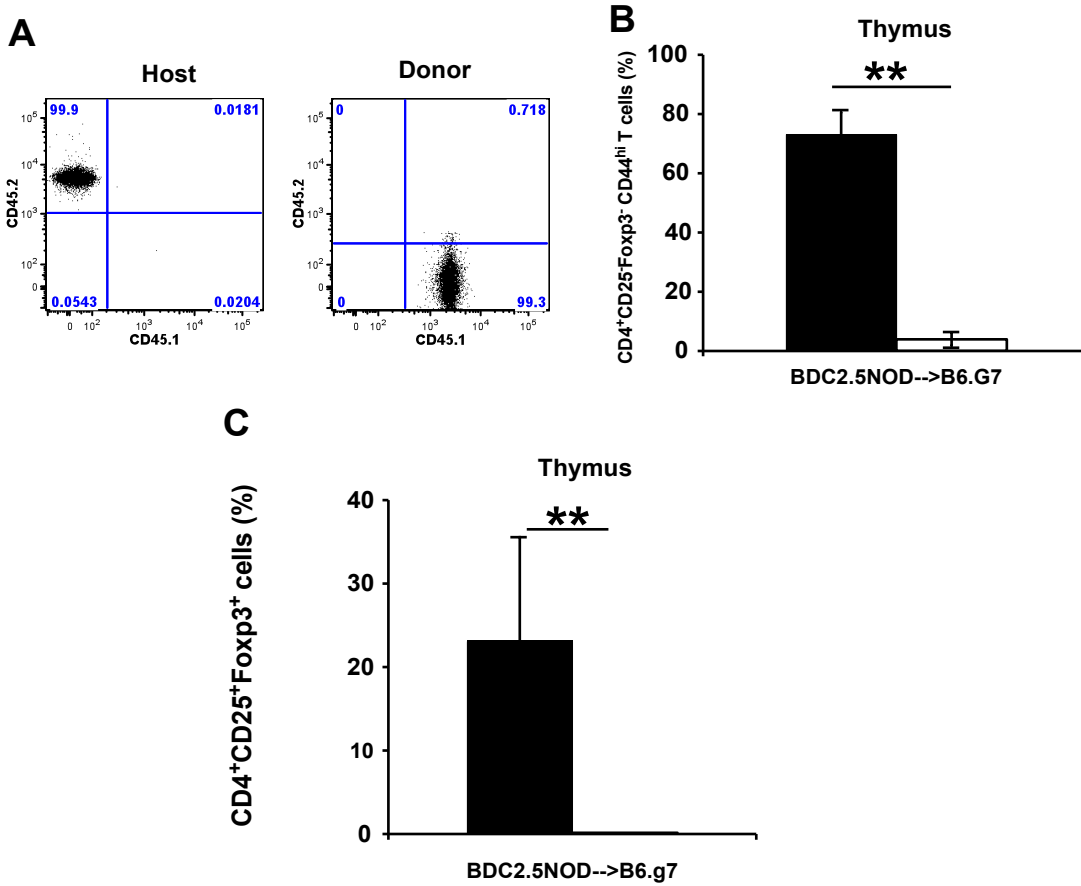

Supplementary Figure 1

A) Expression of congenic markers CD45.1 and CD45.2 in mice. Spleen cells from B6.g7 (left) and BDC2.5NOD (right) were stained with Abs specifically against CD45.2 or CD45.1 and analyzed by flow cytometry. B) CD44 expression on host (black bar) and donor-derived (white bar) CD4<sup>+</sup>CD25<sup>+</sup>Foxp3<sup>-</sup> cells in the thymus of BDC2.5NOD->B6.g7 chimeric mice sacrificed 12 weeks post-reconstitution. C) Frequency of CD4<sup>+</sup>CD25<sup>+</sup>Foxp3<sup>+</sup> cells in the host (black bar) and donor-derived (white bar) thymocytes of the BDC2.5NOD->B6.g7 chimeras sacrificed 12 weeks post-transplant. Frequency shown as mean  $\pm$  SEM, n=3, \*\* P<0.006 (t-test).
